# Supplementary material for: Updates on clinical studies of selenium supplementation in radiotherapy
Source: Springer Nature journal article supplement (doi:10.1186/1748-717x-9-125), 2014-05-29
Supplement: 13014_2013_1106_MOESM1_ESM.pdf [file 13014_2013_1106_MOESM1_ESM.pdf]

167 articles selected for initial screening

Excluded (n=131):

Articles that were not in English (n=17)

Study in cells (n=13)

Study in animals (n=29)

Review articles (n=46)

Others (n=26)

Clinical Studies (n=36)

Excluded (n=20):

Without radiotherapy (n=9)

UV therapy (n=2)

Selenium with other antioxidants (n=6)

Same patients (n=2)

Diagnosis (n=1)

Clinical studies on selenium and radiotherapy (n=16)

Observational studies of selenium levels in patients who underwent radiotherapy (n=10)

Selenium supplementation studies in patients who underwent radiotherapy (n=6)
